# Supplementary material
Source: PubMed Central journal article supplement (PMC5448665)

Coomassie stained gels Extended data Figure 2a

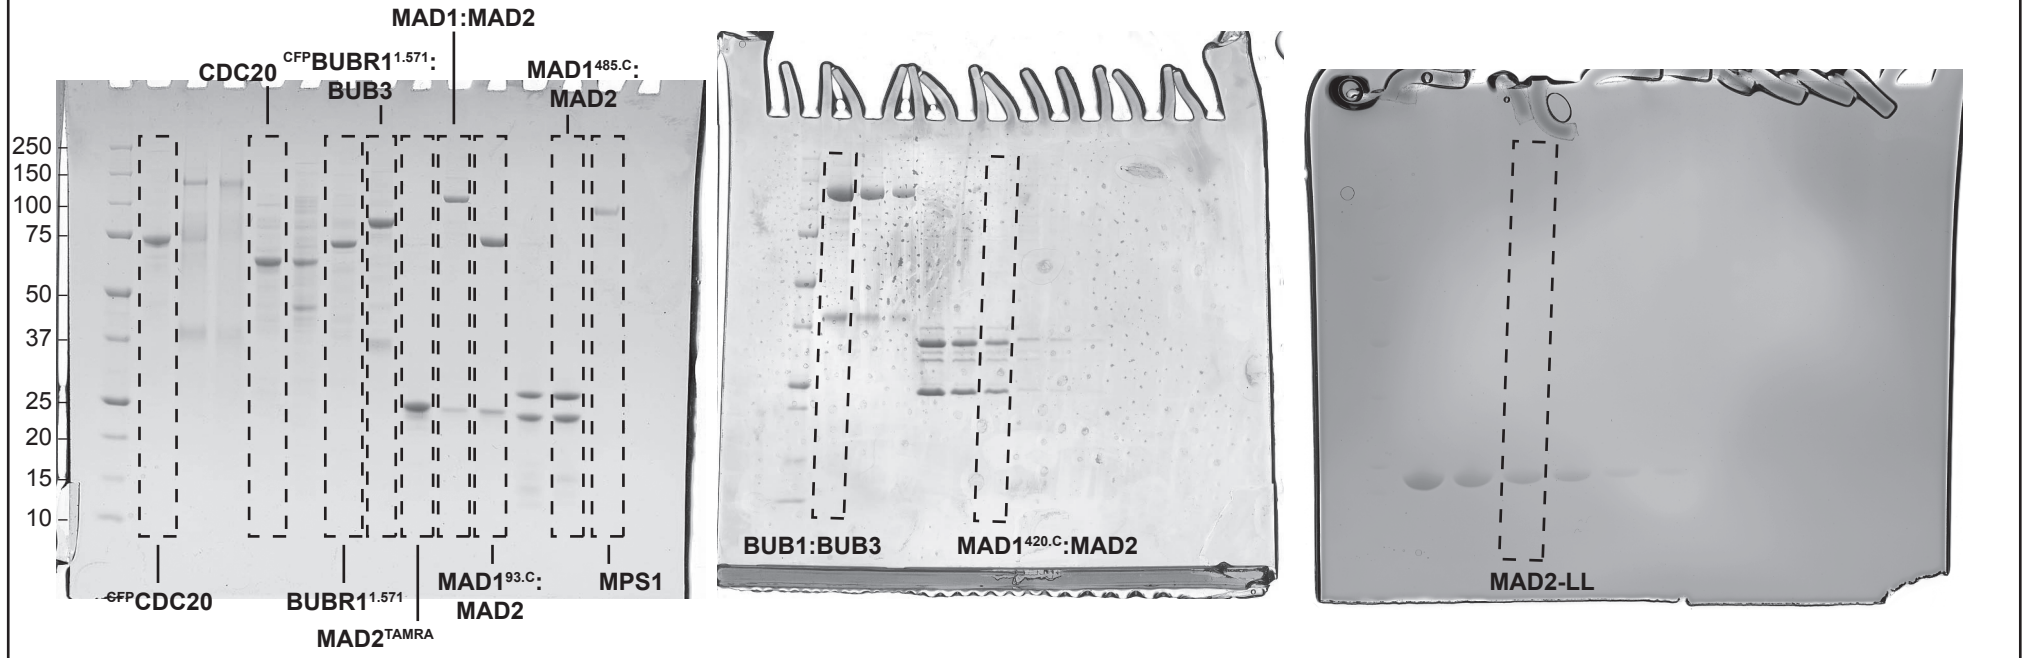

Western Blots Extended data Figure 7c

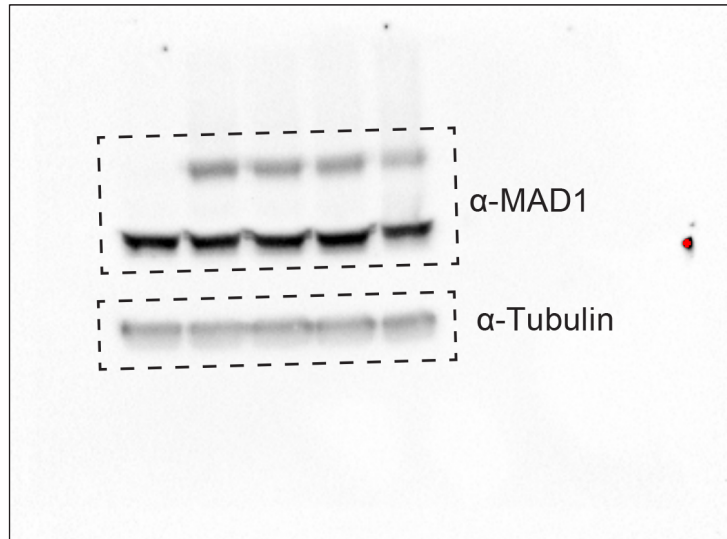

Western Blots Extended data Figure 8d

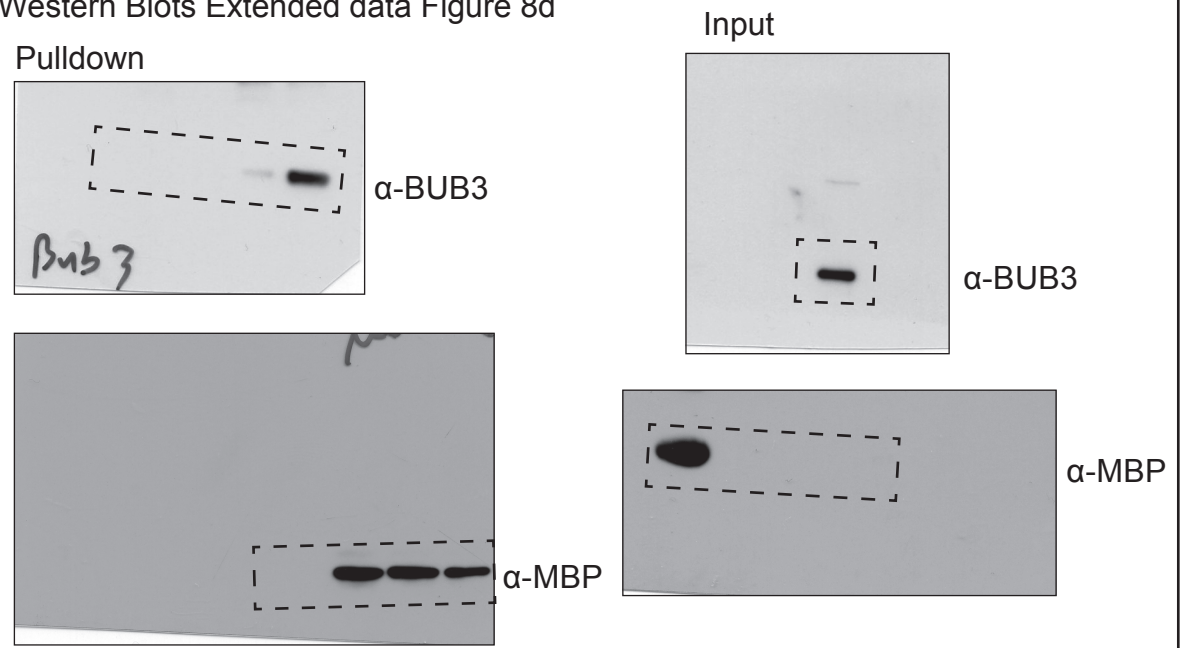

Supplement: NIHMS71101-supplement-Uncropped_Gels_and_Western_Blots.pdf [file NIHMS71101-supplement-Uncropped_Gels_and_Western_Blots.pdf]
